# Supplementary material
Source: ML conference proceedings conference paper supplement (https://openreview.net/forum?id=McAS4XoZJP)
Supplement: supplementary_material [file attachment]

# Datasheet - Alexa Arena: A User-Centric Interactive Platform for Embodied AI

## Motivation

For what purpose was the dataset created? Was there a specific task in mind? Was there a specific gap that needed to be filled? Please provide a description.

The dataset was created to support model development and evaluation for dialog-guided agents for indoor object interaction tasks.

Who created the dataset (e.g., which team, research group) and on behalf of which entity (e.g., company, institution, organization)?

The dataset was created by Alexa AI team in Amazon.

Who funded the creation of the dataset? If there is an associated grant, please provide the name of the grantor and the grant name and number.

Funding was provided by Amazon.

Any other comments?

None.

## Composition

What do the instances that comprise the dataset represent (e.g., documents, photos, people, countries)? Are there multiple types of instances (e.g., movies, users, and ratings; people and interactions between them; nodes and edges)? Please provide a description.

Each instance contains a ground-truth robot action trajectory for finishing an indoor object interaction task, together with a human annotated dialog between a human commander and a robot.

How many instances are there in total (of each type, if appropriate)?

There are in total 9,132 instances.

Does the dataset contain all possible instances or is it a sample (not necessarily random) of instances from a larger set? If the dataset is a sample, then what is the larger set? Is the sample representative of the larger

set (e.g., geographic coverage)? If so, please describe how this representativeness was validated/verified. If it is not representative of the larger set, please describe why not (e.g., to cover a more diverse range of instances, because instances were withheld or unavailable).

The dataset contain all possible instances.

What data does each instance consist of? "Raw" data (e.g., unprocessed text or images) or features? In either case, please provide a description.

Each instance consists of "Raw" data: robot actions and unprocessed text.

Is there a label or target associated with each instance? If so, please provide a description.

N/A.

Is any information missing from individual instances? If so, please provide a description, explaining why this information is missing (e.g., because it was unavailable). This does not include intentionally removed information, but might include, e.g., redacted text.

Everything is included. No data is missing.

Are relationships between individual instances made explicit (e.g., users' movie ratings, social network links)? If so, please describe how these relationships are made explicit.

Several instances share the same object interaction task (and thus share the same ground-truth robot action trajectory). This relationship is made explicit via that these instances share the same task ID.

Are there recommended data splits (e.g., training, development/validation, testing)? If so, please provide a description of these splits, explaining the rationale behind them.

The dataset has been randomly split into a training set (7,983 instances) and a validation set (1,149 instances).

Are there any errors, sources of noise, or redundancies

in the dataset? If so, please provide a description.  
Human text annotations could contain noise data.

Is the dataset self-contained, or does it link to or otherwise rely on external resources (e.g., websites, tweets, other datasets)? If it links to or relies on external resources, a) are there guarantees that they will exist, and remain constant, over time; b) are there official archival versions of the complete dataset (i.e., including the external resources as they existed at the time the dataset was created); c) are there any restrictions (e.g., licenses, fees) associated with any of the external resources that might apply to a dataset consumer? Please provide descriptions of all external resources and any restrictions associated with them, as well as links or other access points, as appropriate.

The dataset is entirely self-contained.

Does the dataset contain data that might be considered confidential (e.g., data that is protected by legal privilege or by doctor–patient confidentiality, data that includes the content of individuals’ non-public communications)? If so, please provide a description.  
None as we know.

Does the dataset contain data that, if viewed directly, might be offensive, insulting, threatening, or might otherwise cause anxiety? If so, please describe why.  
None as we know.

Does the dataset identify any subpopulations (e.g., by age, gender)? If so, please describe how these subpopulations are identified and provide a description of their respective distributions within the dataset.  
No.

Is it possible to identify individuals (i.e., one or more natural persons), either directly or indirectly (i.e., in combination with other data) from the dataset? If so, please describe how.  
No.

Does the dataset contain data that might be considered sensitive in any way (e.g., data that reveals race or ethnic origins, sexual orientations, religious beliefs, political opinions or union memberships, or locations; financial or health data; biometric or genetic data; forms of government identification, such as social security numbers; criminal history)? If so, please provide a description.  
None as we know.

Any other comments?

None

## Collection Process

How was the data associated with each instance acquired? Was the data directly observable (e.g., raw text, movie ratings), reported by subjects (e.g., survey responses), or indirectly inferred/derived from other data (e.g., part-of-speech tags, model-based guesses for age or language)? If the data was reported by subjects or indirectly inferred/derived from other data, was the data validated/verified? If so, please describe how.

In each data instance, the ground-truth robot action trajectory was generated programmatically via a planning algorithm, the natural language dialog was collected via crowd-sourcing (on Amazon Mechanical Turk). The data is directly observable (raw text and symbolic representation of robot action trajectories).

What mechanisms or procedures were used to collect the data (e.g., hardware apparatuses or sensors, manual human curation, software programs, software APIs)? How were these mechanisms or procedures validated?

The human annotations were collected through crowd-sourcing on Amazon Mechanical Turk, where the human annotators watch the robot action video clip and read related language instructions, and input their text annotation via typing.

If the dataset is a sample from a larger set, what was the sampling strategy (e.g., deterministic, probabilistic with specific sampling probabilities)?  
N/A.

Who was involved in the data collection process (e.g., students, crowdworkers, contractors) and how were they compensated (e.g., how much were crowdworkers paid)?  
Crowdworkers were paid around 1 US dollar for annotating each data instance.

Over what timeframe was the data collected? Does this timeframe match the creation timeframe of the data associated with the instances (e.g., recent crawl of old news articles)? If not, please describe the timeframe in which the data associated with the instances was created.  
The data were collected between June 2022 and August 2022.

Were any ethical review processes conducted (e.g., by

an institutional review board)? If so, please provide a description of these review processes, including the outcomes, as well as a link or other access point to any supporting documentation.  
No.

Did you collect the data from the individuals in question directly, or obtain it via third parties or other sources (e.g., websites)?  
The crowd-sourcing data annotation was carried out on Amazon Mechanical Turk.

Were the individuals in question notified about the data collection? If so, please describe (or show with screenshots or other information) how notice was provided, and provide a link or other access point to, or otherwise reproduce, the exact language of the notification itself.  
The crowd-sourcing workers were notified about the data collection via their contract with Amazon Mechanical Turk.

Did the individuals in question consent to the collection and use of their data? If so, please describe (or show with screenshots or other information) how consent was requested and provided, and provide a link or other access point to, or otherwise reproduce, the exact language to which the individuals consented.  
The crowd-sourcing workers consent to the collection and use of their data according to their contract with Amazon Mechanical Turk.

If consent was obtained, were the consenting individuals provided with a mechanism to revoke their consent in the future or for certain uses? If so, please provide a description, as well as a link or other access point to the mechanism (if appropriate).  
Unknown to the authors of the datasheet.

Has an analysis of the potential impact of the dataset and its use on data subjects (e.g., a data protection impact analysis) been conducted? If so, please provide a description of this analysis, including the outcomes, as well as a link or other access point to any supporting documentation.  
No.

Any other comments?  
None.

### Preprocessing/cleaning/labeling

Was any preprocessing/cleaning/labeling of the data done (e.g., discretization or bucketing, tokenization,

part-of-speech tagging, SIFT feature extraction, removal of instances, processing of missing values)? If so, please provide a description. If not, you may skip the remaining questions in this section.  
A subset of human text annotations were removed due to low quality, and these annotation jobs were then re-assigned to other annotators.

Was the “raw” data saved in addition to the preprocessed/cleaned/labeled data (e.g., to support unanticipated future uses)? If so, please provide a link or other access point to the “raw” data.  
No.

Is the software that was used to preprocess/clean/label the data available? If so, please provide a link or other access point.  
N/A.

Any other comments?  
None.

### Uses

Has the dataset been used for any tasks already? If so, please provide a description. Apart from this paper, this dataset was provided to the participating teams in the Alexa Prize Simbot Challenge, to support their agent development. More details can be found on <https://www.amazon.science/alexaprize/simbot-challenge>

Is there a repository that links to any or all papers or systems that use the dataset? If so, please provide a link or other access point.  
No.

What (other) tasks could the dataset be used for?  
This dataset can be used for model development and evaluation for dialog-guided agents for indoor object interaction tasks.

Is there anything about the composition of the dataset or the way it was collected and preprocessed/cleaned/labeled that might impact future uses? For example, is there anything that a dataset consumer might need to know to avoid uses that could result in unfair treatment of individuals or groups (e.g., stereotyping, quality of service issues) or other risks or harms (e.g., legal risks, financial harms)? If so, please provide a description. Is there anything a dataset consumer could do to mitigate these risks or harms?  
Unknown to the authors of the datasheet.

Are there tasks for which the dataset should not be used? If so, please provide a description.  
Unknown to the authors of the datasheet.

Any other comments?  
None.

### Distribution

Will the dataset be distributed to third parties outside of the entity (e.g., company, institution, organization) on behalf of which the dataset was created? If so, please provide a description.  
Yes, the dataset is available on the Internet.

How will the dataset will be distributed (e.g., tarball on website, API, GitHub)? Does the dataset have a digital object identifier (DOI)?  
The dataset is available on GitHub ([Click Here](#)).  
The dataset does not have a DOI.

When will the dataset be distributed?  
The dataset is already available online.

Will the dataset be distributed under a copyright or other intellectual property (IP) license, and/or under applicable terms of use (ToU)? If so, please describe this license and/or ToU, and provide a link or other access point to, or otherwise reproduce, any relevant licensing terms or ToU, as well as any fees associated with these restrictions.  
The dataset is under CC-BY-NC 4.0 license.

Have any third parties imposed IP-based or other restrictions on the data associated with the instances? If so, please describe these restrictions, and provide a link or other access point to, or otherwise reproduce, any relevant licensing terms, as well as any fees associated with these restrictions.  
The Arena Simulator Executable is under a custom license. ([Click Here](#))

Do any export controls or other regulatory restrictions apply to the dataset or to individual instances? If so, please describe these restrictions, and provide a link or other access point to, or otherwise reproduce, any supporting documentation.  
Unknown to authors of the datasheet.

Any other comments?

None.

### Maintenance

Who will be supporting/hosting/maintaining the dataset?  
The authors of this paper.

How can the owner/curator/manager of the dataset be contacted (e.g., email address)?  
Email: [arena-admins@amazon.com](mailto:arena-admins@amazon.com)

Is there an erratum? If so, please provide a link or other access point.  
No.

Will the dataset be updated (e.g., to correct labeling errors, add new instances, delete instances)? If so, please describe how often, by whom, and how updates will be communicated to dataset consumers (e.g., mailing list, GitHub)?  
No planned updates at the time of preparing this datasheet.

If the dataset relates to people, are there applicable limits on the retention of the data associated with the instances (e.g., were the individuals in question told that their data would be retained for a fixed period of time and then deleted)? If so, please describe these limits and explain how they will be enforced.  
Unknown to authors of the datasheet.

Will older versions of the dataset continue to be supported/hosted/maintained? If so, please describe how. If not, please describe how its obsolescence will be communicated to dataset consumers.  
N/A.

If others want to extend/augment/build on/contribute to the dataset, is there a mechanism for them to do so? If so, please provide a description. Will these contributions be validated/verified? If so, please describe how. If not, why not? Is there a process for communicating/distributing these contributions to dataset consumers? If so, please provide a description.  
Others may do so and should contact the original authors about incorporating fixes/extensions.

Any other comments?  
None.
